# Supplementary material
Source: PubMed Central journal article supplement (PMC5985661)
Supplement: NIHMS925933-supplement-1.pdf [file NIHMS925933-supplement-1.pdf]

1 **Supplemental Figures**

2

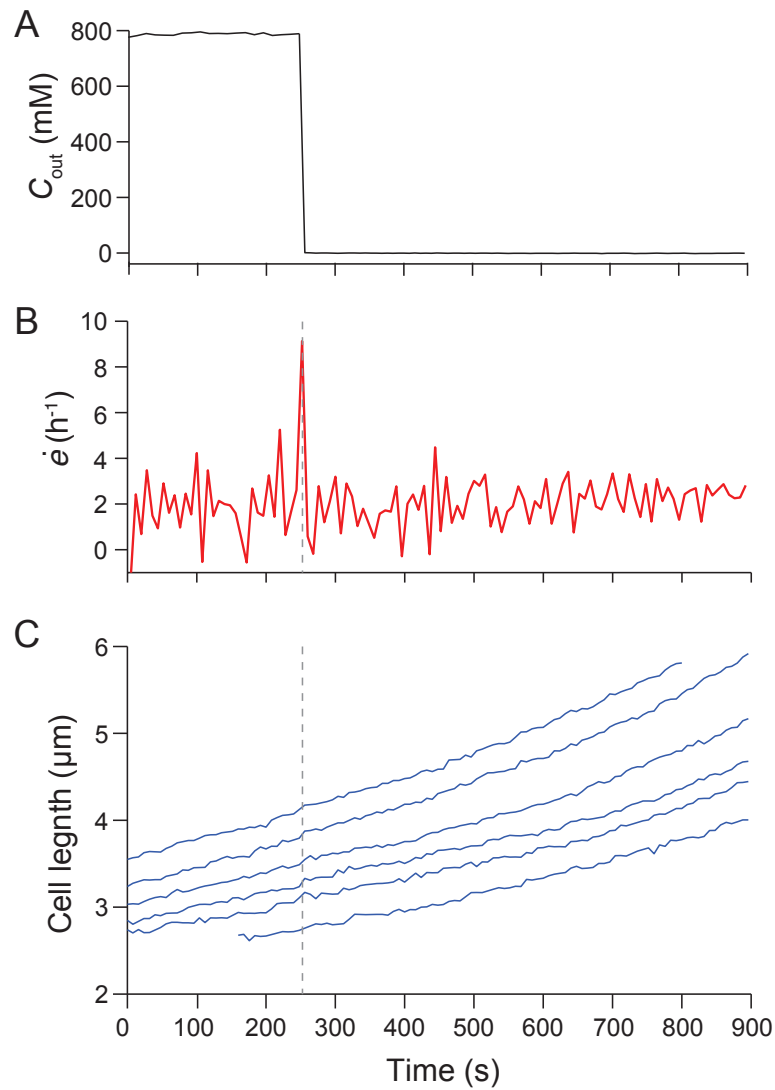

3

4 **Supplemental Figure 1: Hypoosmotic shock does not cause growth inhibition in *E. coli*.**

5 Related to Figure 1.

6 A) Concentration of sorbitol in the growth medium during an 800-mM hypoosmotic shock.

7 The medium was exchanged within 3 s during this experiment.

8 B) Population-averaged elongation rate of *E. coli* cells during the shock ( $n = 32$  cells).

9 C) Length of representative *E. coli* cells during the shock. The dotted lines indicate the time  
10 of shock.

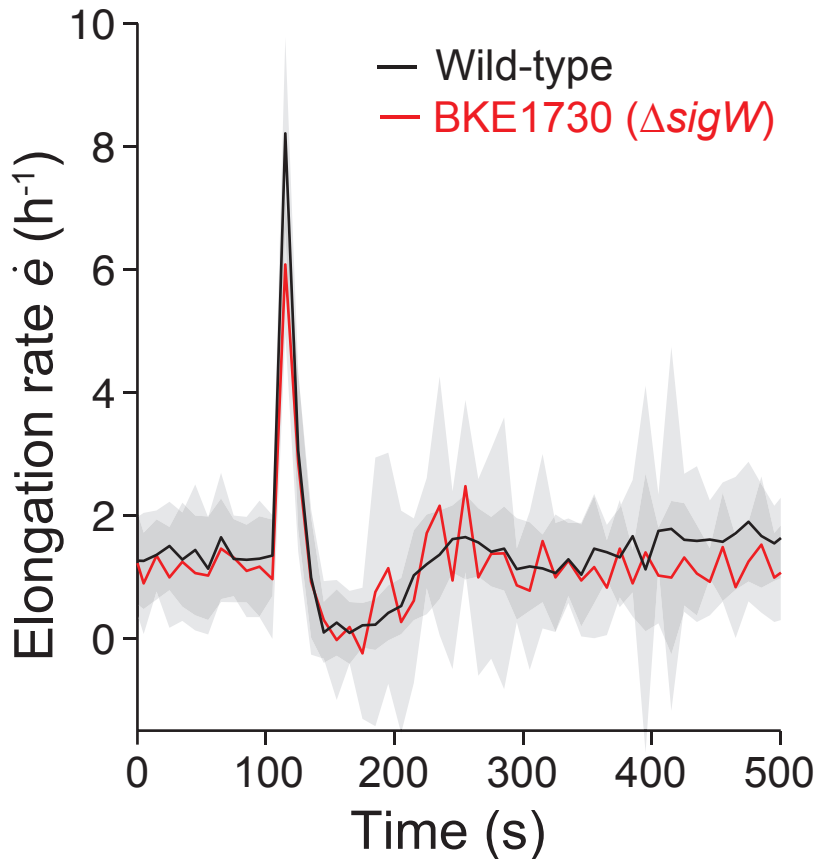

11

12 **Supplemental Figure 2: SigmaW has no effect on the growth-inhibition response.** Related to

13 Figure 2.

14 Population-averaged elongation rate of wild-type *B. subtilis* 168 and BKE1730 cells lacking the

15 sigma factor  $\sigma_w$  ( $n = 25$  and  $n = 68$  chains for strains 168 and BKE1730, respectively). Shading

16 indicates  $\pm 1$  standard deviation (s.d.).

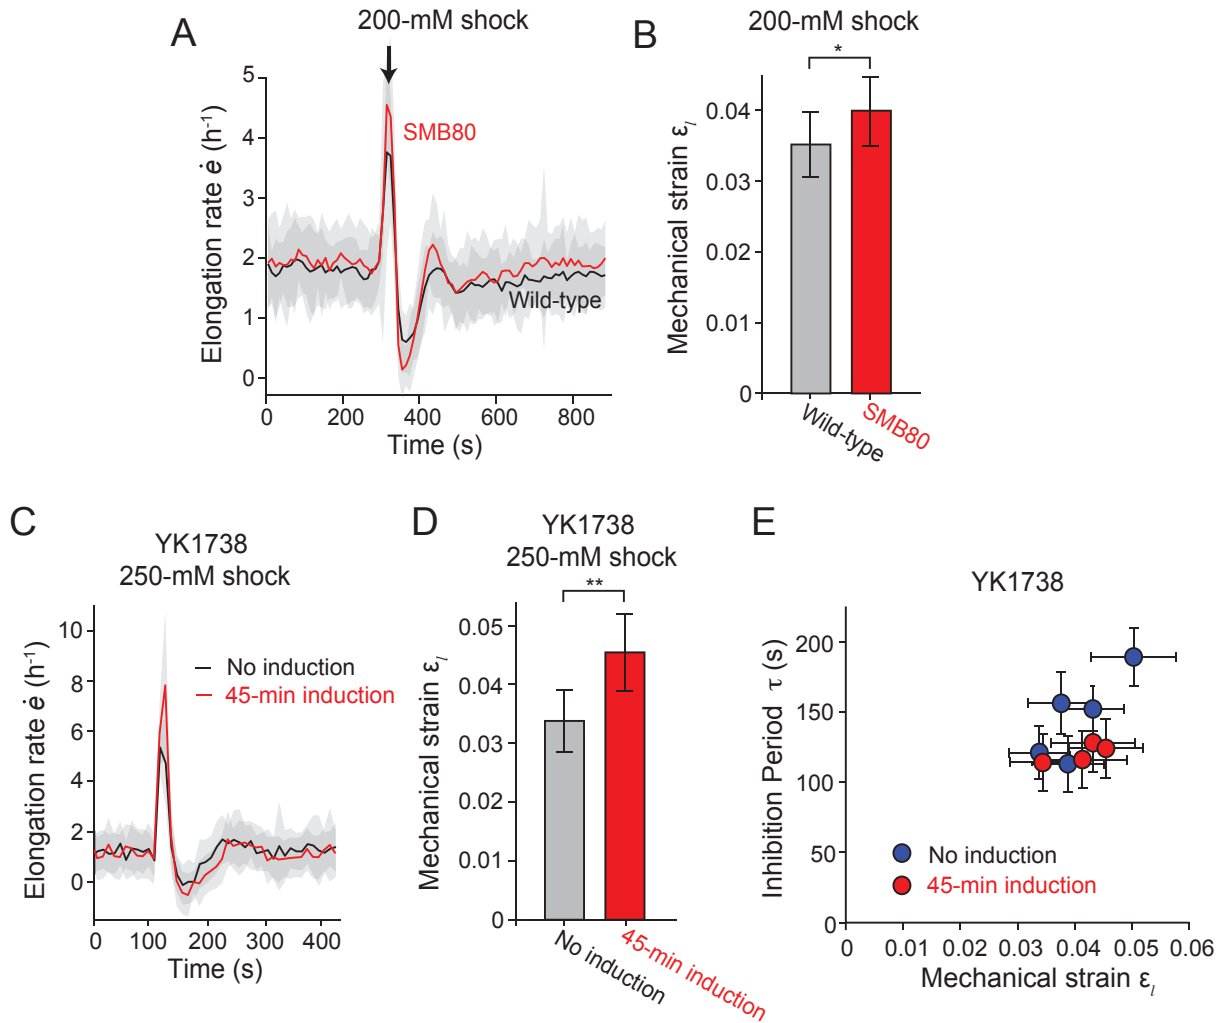

17

18 **Supplemental Figure 3: Membrane overproduction causes increased swelling.** Related to

19 Figure 5.

20 A,B) Population-averaged elongation rate (A) and mechanical strain (B) of wild-type *B.*

21 *subtilis* JH642 (black line) and *B. subtilis* SMB80 lacking stretch-activated ion channels

22 (red line) during a 200-mM hypoosmotic shock (from LB + 500 mM sorbitol to LB +

23 300 mM sorbitol;  $n = 19$  and  $n = 20$  chains for wild-type and SMB80, respectively).

24 Shading in (A) and error bars in (B) indicate  $\pm 1$  s.d. \*: Student's *t*-test,  $p = 0:0029$ .

25 C,D) Population-averaged elongation rate (C) and mechanical strain (D) of *B. subtilis*

26 YK1738 during a 250-mM hypoosmotic shock (from LB + 1M sorbitol to LB + 750

27 mM sorbitol) with wild-type levels of AccDA (black line) and induction of AccDA  
28 overexpression for 45 min (red line;  $n = 54$  and  $n = 104$  chains for uninduced and  
29 induced, respectively). Shading in (C) and error bars in (D) indicate  $\pm 1$  s.d. \*\*:   
30 Student's  $t$ -test,  $p < 0:0001$ .

31 E) Inhibition period versus mechanical strain of *B. subtilis* YK1738 across a range of shock  
32 magnitudes ( $150 \text{ mM} < C_{\text{out}} < 750 \text{ mM}$ ), with wild-type levels of AccDA (blue dots) and  
33 induction of AccDA overexpression for 45 min (red dots; each point represents the  
34 average of 19-164 chains). Error bars indicate  $\pm 1$  s.d.

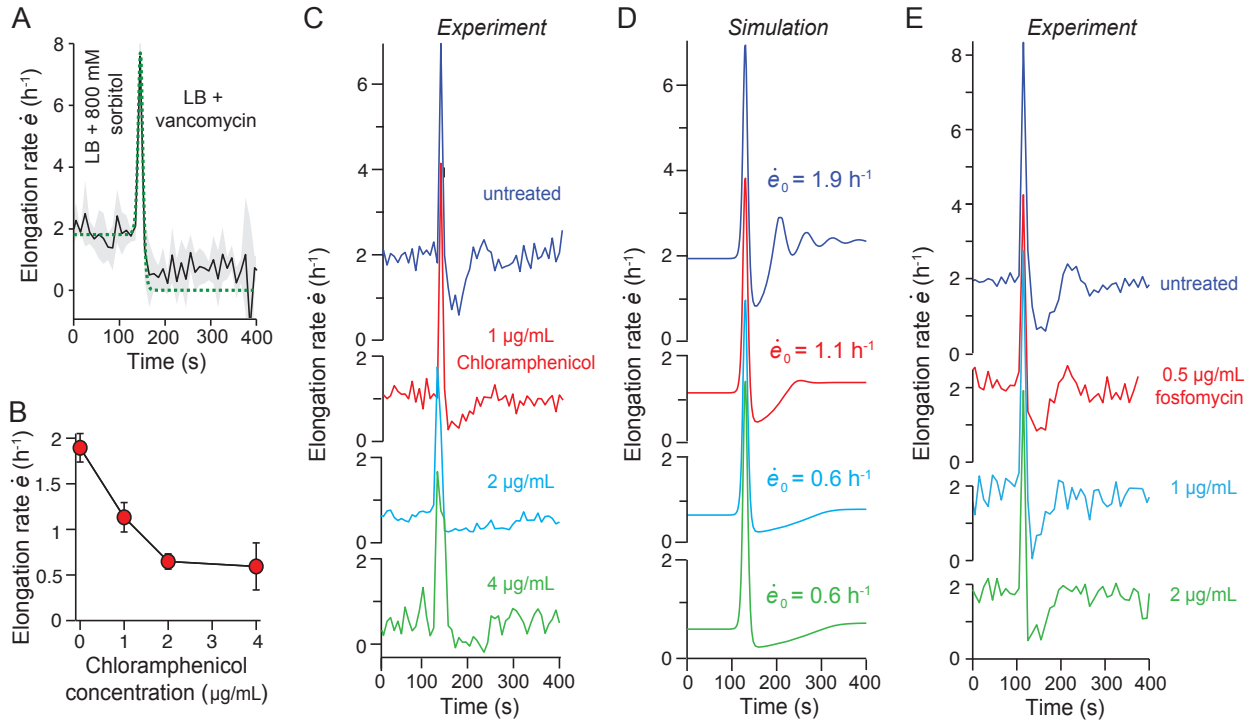

35

36 **Supplemental Figure 4: Response to hypoosmotic shock in the presence of antibiotics.**

37 Related to Figure 4.

38 A) Population-averaged elongation rate in response to 800-mM hypoosmotic shock, where  
 39 the medium was switched from LB + 800 mM sorbitol to LB + 10  $\mu\text{g}/\text{mL}$  vancomycin ( $n$   
 40 = 5 chains).

41 B) Population-averaged elongation rate decreased with increasing concentration of  
 42 chloramphenicol in the growth medium (each point represents the average of 15-37 cell  
 43 chains). Error bars indicate  $\pm 1$  s.d.

44 C) Population-averaged elongation rate versus time during a 500-mM hypoosmotic shock  
 45 (from LB + 500mM sorbitol to LB) from experiments in which 0, 1, 2, or 4  $\mu\text{g}/\text{mL}$   
 46 chloramphenicol was included in the growth medium (each trace represents the average  
 47 of 15-37 cell chains).

- 48 D) Elongation rate during a 500-mM hypoosmotic shock predicted by the tension-inhibition  
49 model when the initial elongation rate ( $\dot{\epsilon}$ ) was specified to the experimental value  
50 observed when 0, 1, 2, or 4  $\mu\text{g}/\text{mL}$  chloramphenicol was included in the growth medium.
- 51 E) Population-averaged elongation rate versus time during a 500-mM hypoosmotic shock  
52 (from LB + 500 mM sorbitol to LB) from four experiments in which 0, 0.5, 1, or 2  
53  $\mu\text{g}/\text{mL}$  fosfomycin was included in the growth media (each trace represents the average  
54 of 34-70 cell chains).

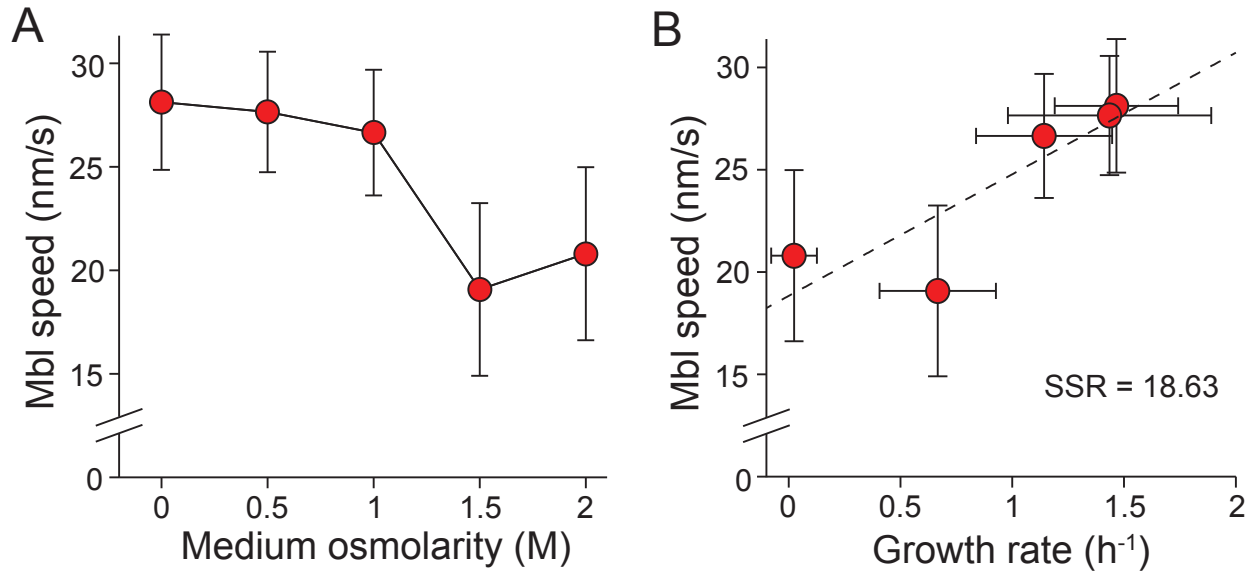

55

56 **Supplemental Figure 5: Mbl speed depends on medium osmolarity.** Related to Figure 6.

57 A) Ensemble-averaged speed of Mbl puncta decreases with increasing medium osmolarity  
 58 during steady-state growth (each point represents the average of 491-1742 puncta). Error  
 59 bars indicate  $\pm 1$  standard error of the mean (s.e.m.).

60 B) Ensemble-averaged speed of Mbl puncta increases with increasing growth rate during  
 61 steady-state growth, when growth rate was modulated by medium osmolarity (each point  
 62 represents the average of 491-1742 puncta). Error bars indicate  $\pm 1$  s.e.m. SSR: Sum of  
 63 squared residuals.



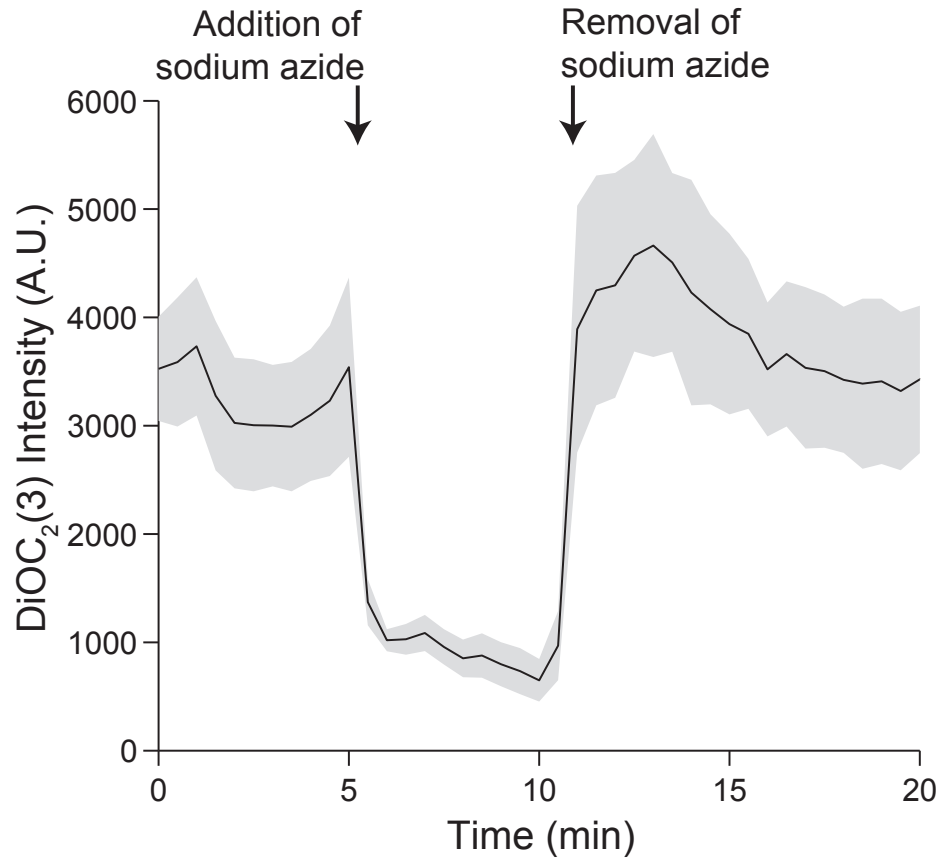

64

65 **Supplemental Figure 6: DiOC<sub>2</sub>(3) reports membrane depolarization by sodium azide.**

66 Related to Figure 7.

67 Population-averaged fluorescence intensity of cells stained with DiOC<sub>2</sub>(3) during a 5-min

68 treatment with 1 mg/mL sodium azide ( $n = 12$  chains). Shading indicates  $\pm 1$  s.d.

69 **Supplemental Tables**

70

71 **Supplemental Table 1: List of strains used in this study.** Related to STAR Methods.

| <b>Strain</b> | <b>Species</b>                 | <b>Genotype</b>                                                                                                       | <b>Reference</b>                                                                  |
|---------------|--------------------------------|-----------------------------------------------------------------------------------------------------------------------|-----------------------------------------------------------------------------------|
| JH642         | <i>B. subtilis</i>             | Wildtype, <i>trpC2 pheA1</i>                                                                                          | <i>Bacillus</i> Genetic Stock Center 1A96                                         |
| BMD122        | <i>B. subtilis</i>             | 168, <i>sfGFP-mbl::spec</i>                                                                                           | Gift from the Ethan Garner Lab                                                    |
| YK1738        | <i>B. subtilis</i>             | 168CA $\Omega$ <i>amyE::P<sub>xyI</sub><sup>-</sup> accDA spc</i>                                                     | Gift from the Jeff Errington Lab (Mercier et al., <i>Cell</i> 2013)               |
| SMB80         | <i>B. subtilis</i>             | JH642, <i>mscL::spc</i> , $\Delta$ ( <i>ydhY::ery</i> ), $\Delta$ ( <i>yfkC::tet</i> ), $\Delta$ ( <i>ykuT::cat</i> ) | Gift from the Erhard Bremer Lab (Hoffmann et al., <i>Appl Env Microbiol</i> 2008) |
| BKE01730      | <i>B. subtilis</i>             | 168, <i>sigW::MLS</i>                                                                                                 | Gift from the Carol Gross lab (Koo et al., <i>Cell Syst</i> 2017)                 |
| JAT150        | <i>Listeria monocytogenes</i>  | 1040 $\beta$ S, <i>actA::comK</i>                                                                                     | Laboratory stock                                                                  |
| CN1491        | <i>Clostridium perfringens</i> | Wildtype                                                                                                              | ATCC13124, gift from the Justin Sonnenburg Lab                                    |

72
